# Supplementary figures and images for: Polyimide-based porous carbon and cobalt nanoparticle composites as high-performance electromagnetic wave absorbers
Source: Royal Society of Chemistry journal article supplement (doi:10.1039/d4ra00488d), 2024-01-01

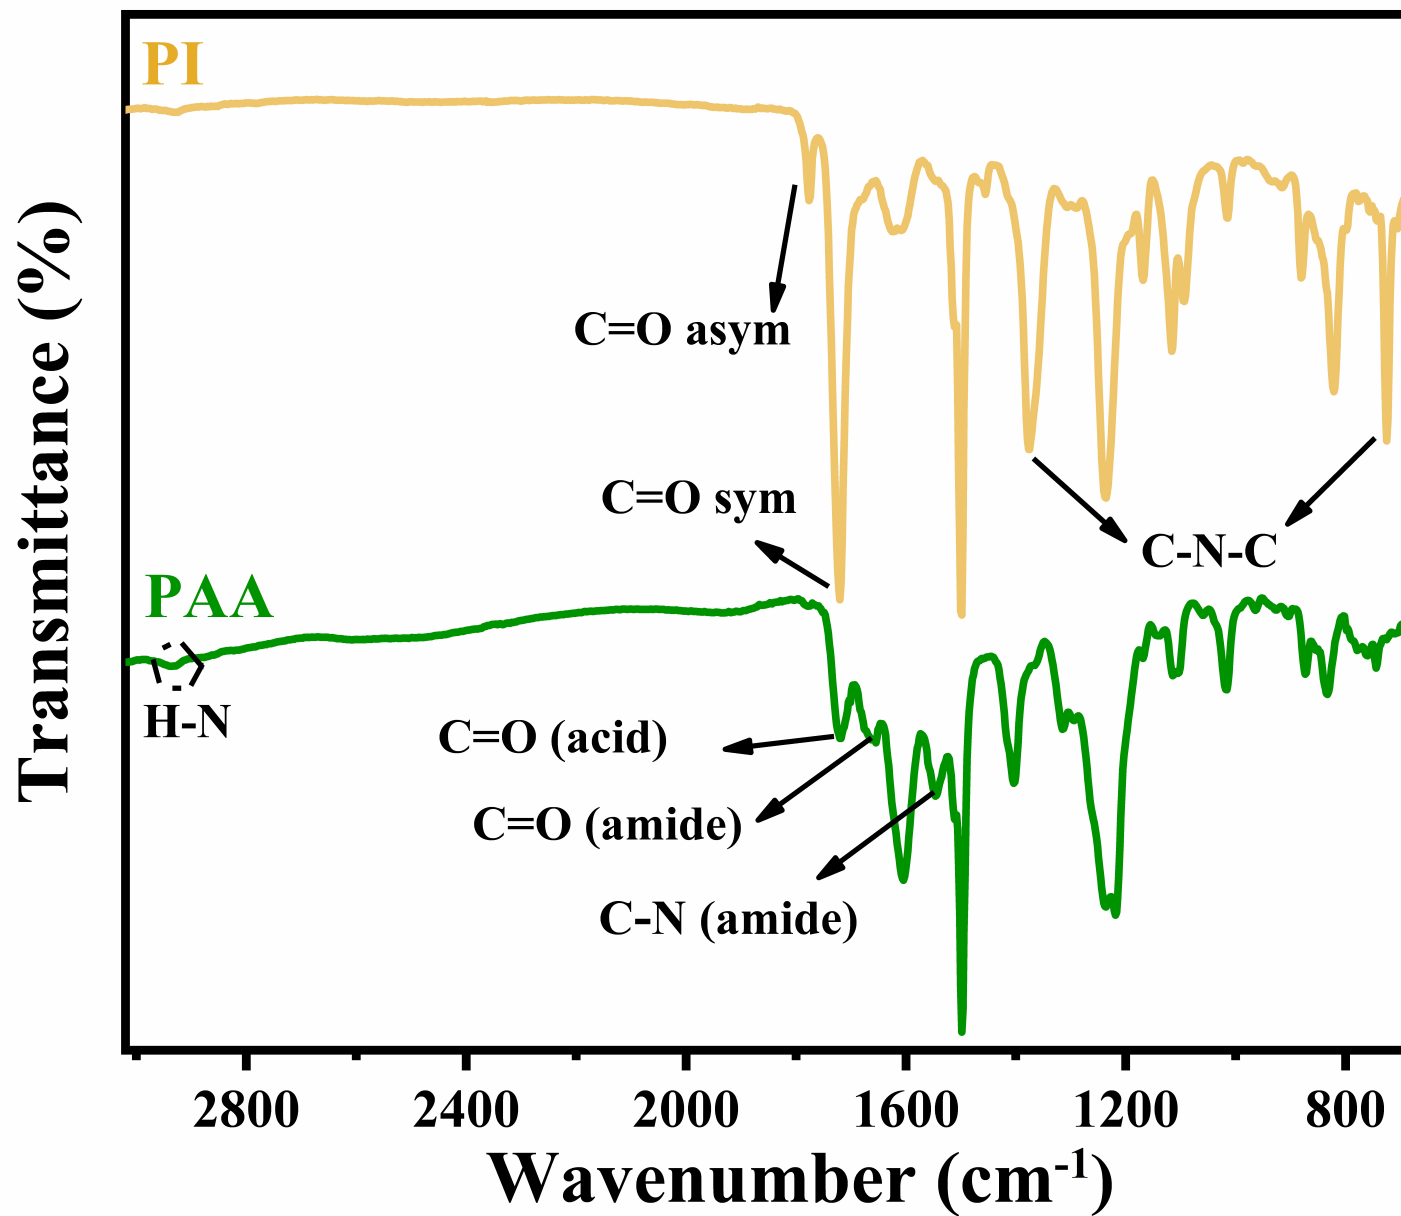

Supplement: d4ra00488d2.pdf [file d4ra00488d2.pdf]

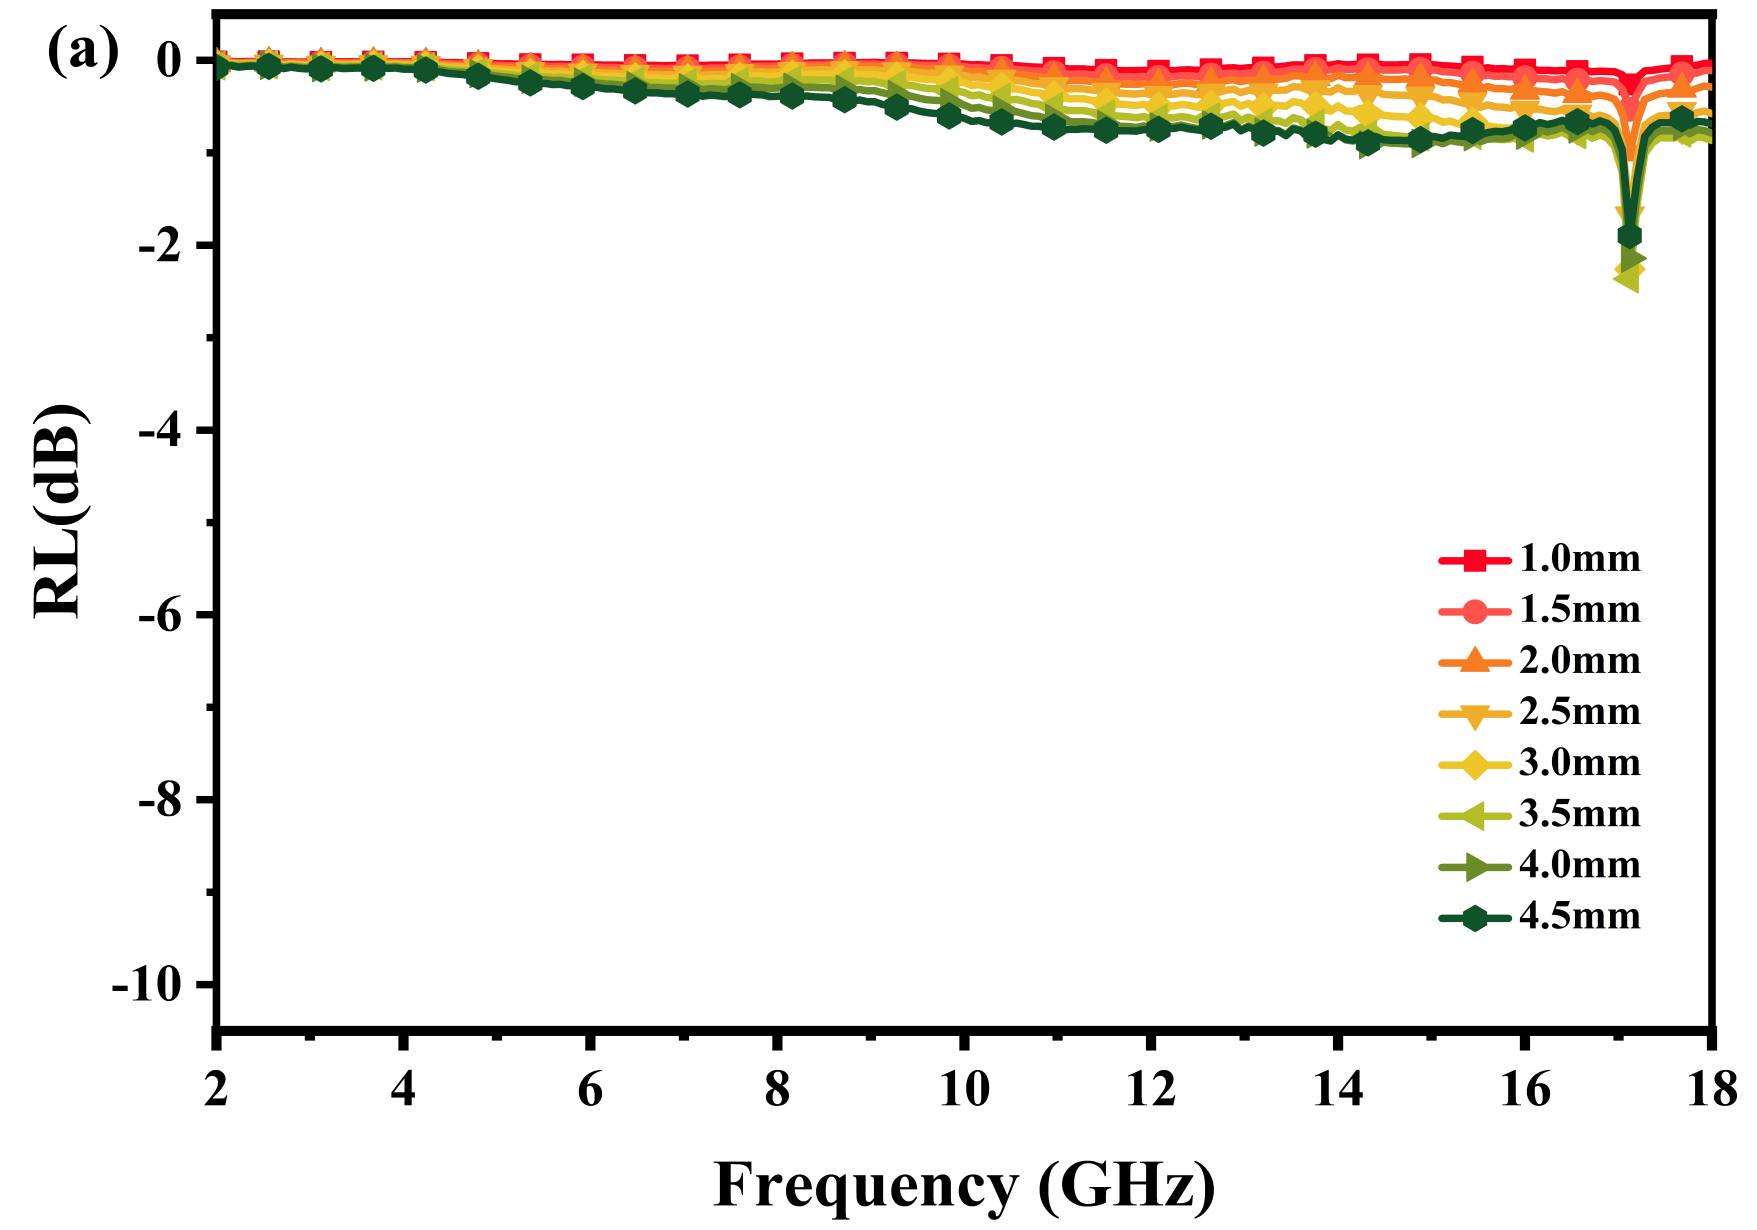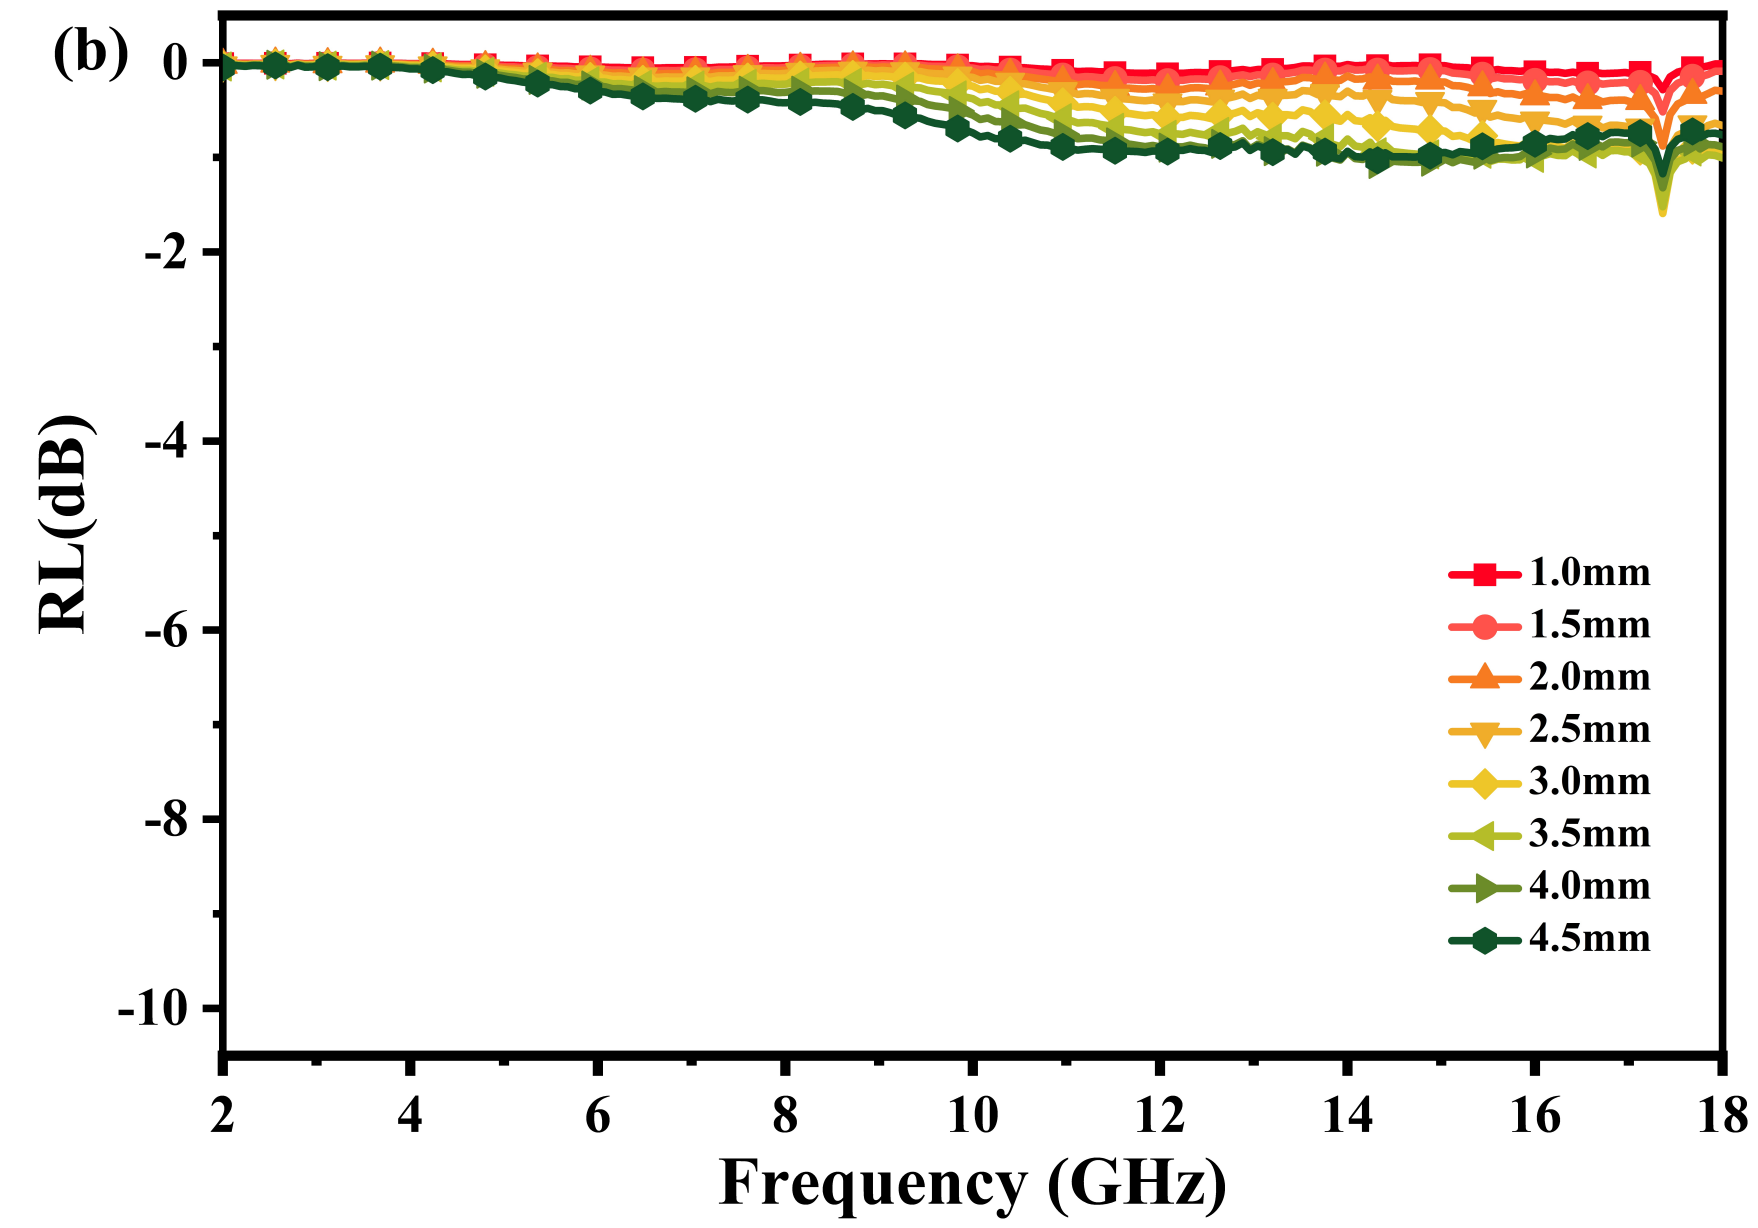

Supplement: d4ra00488d3.pdf [file d4ra00488d3.pdf]

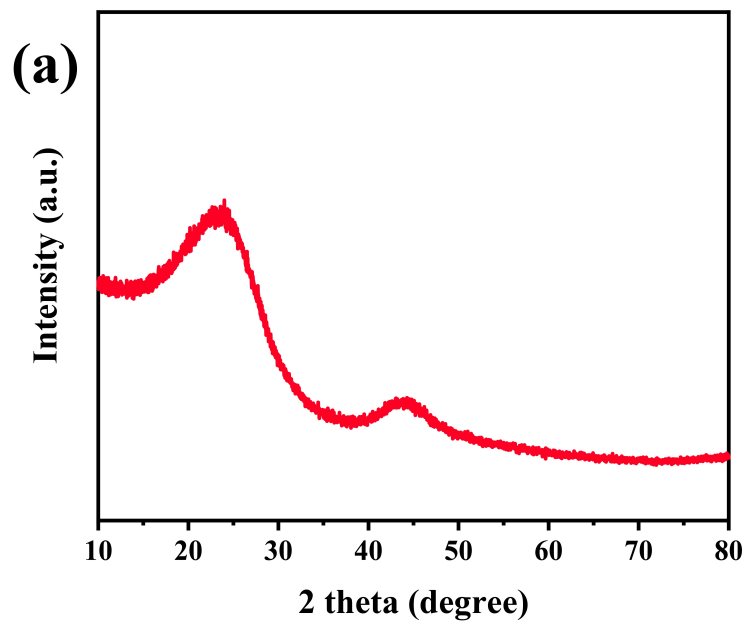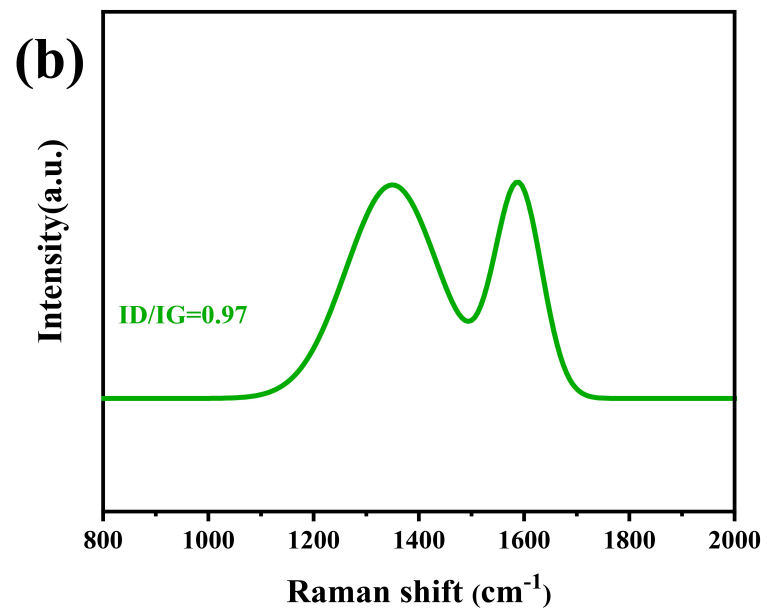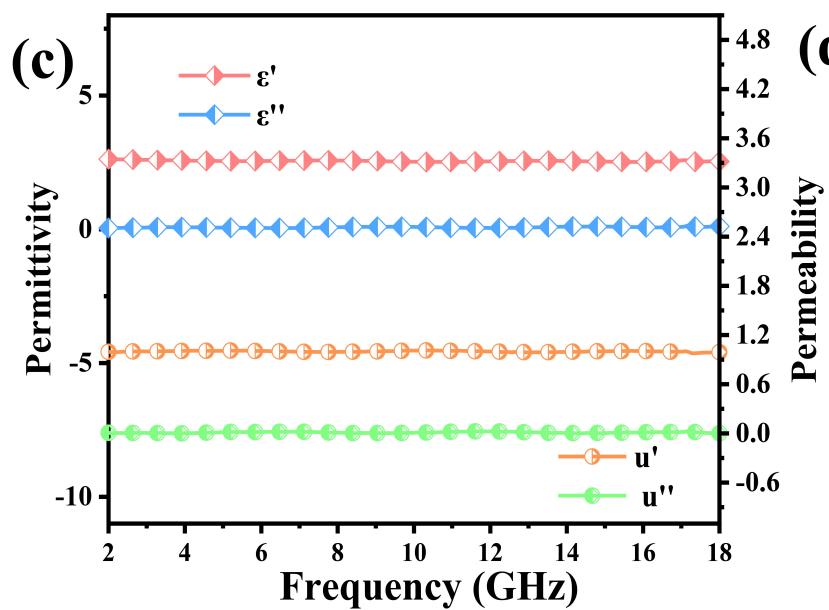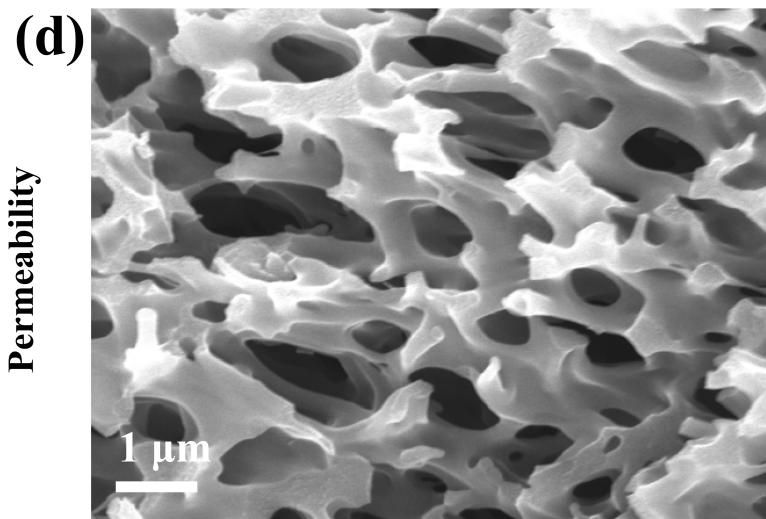

Supplement: d4ra00488d4.pdf [file d4ra00488d4.pdf]

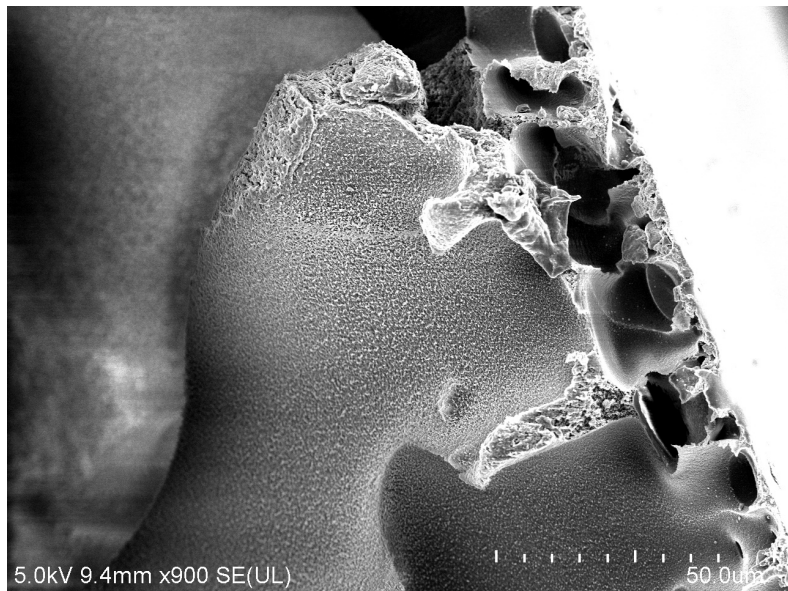

Supplement: d4ra00488d5.pdf [file d4ra00488d5.pdf]

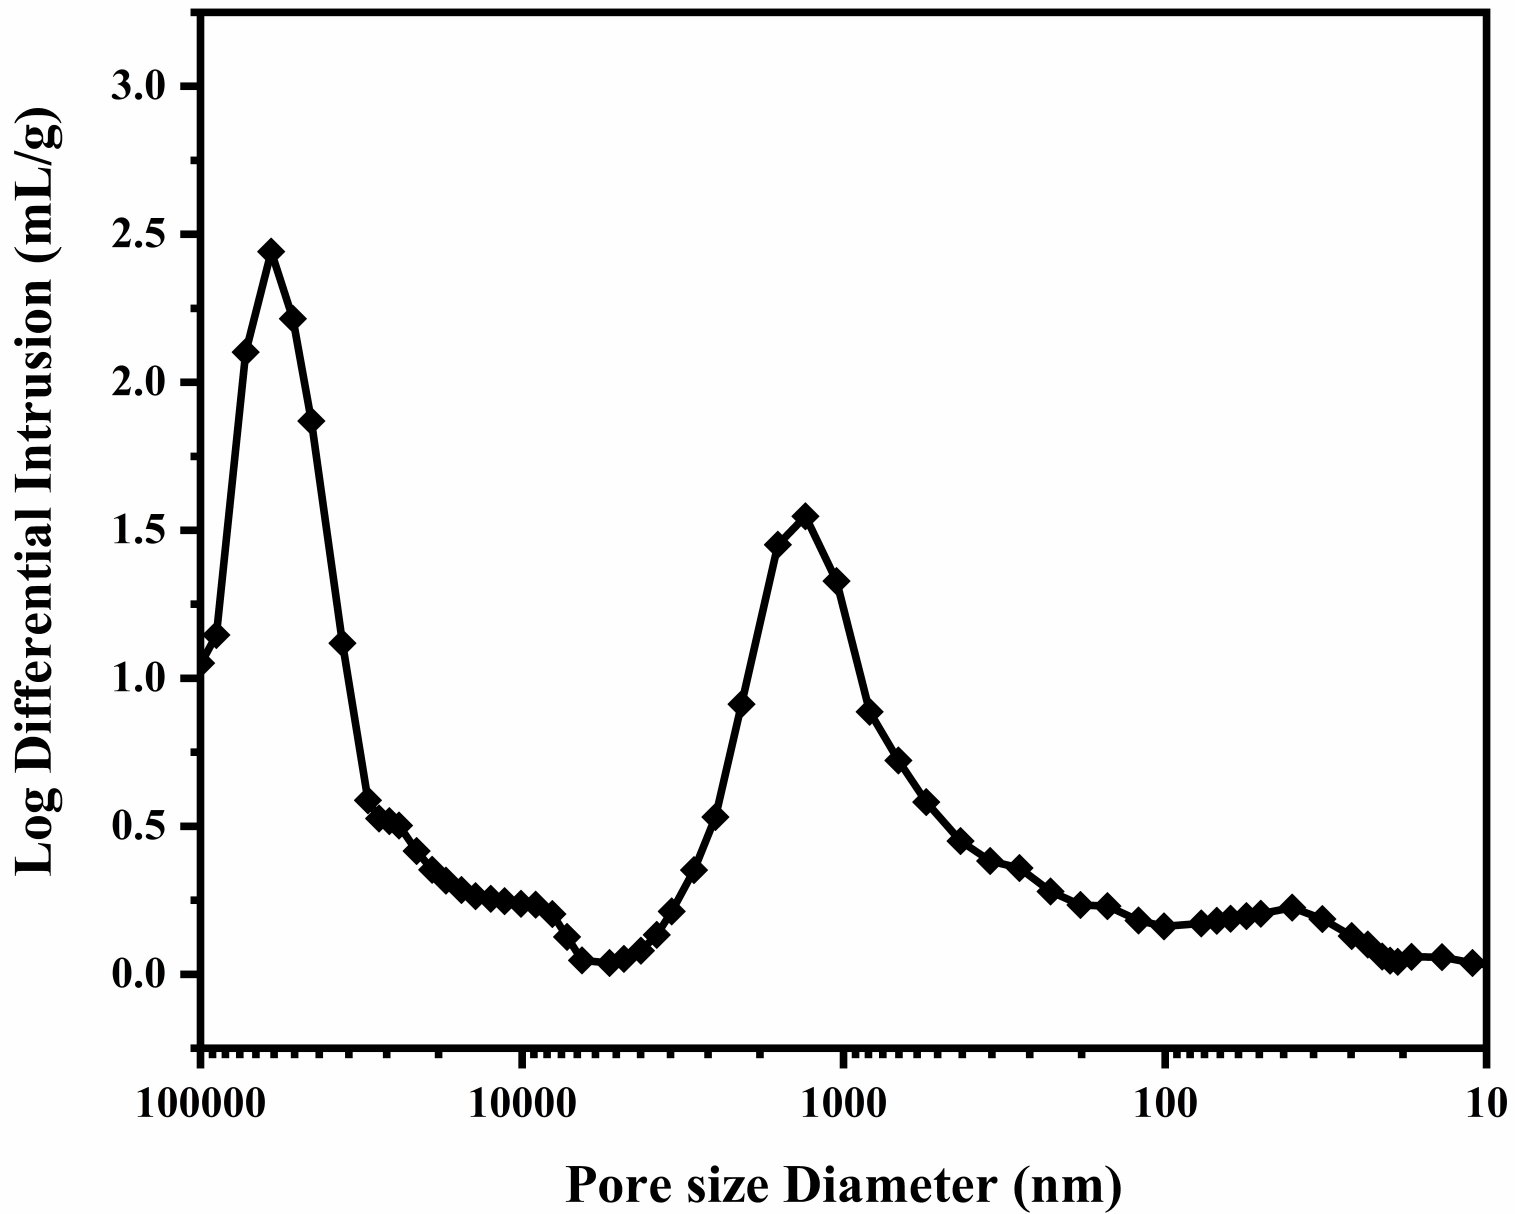

Supplement: d4ra00488d6.pdf [file d4ra00488d6.pdf]

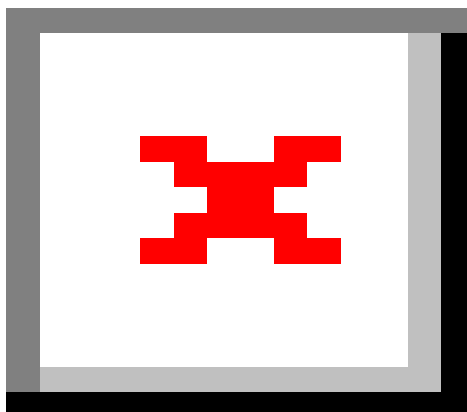

**Fig. S4.** Pore size distribution plots for PPC-700.

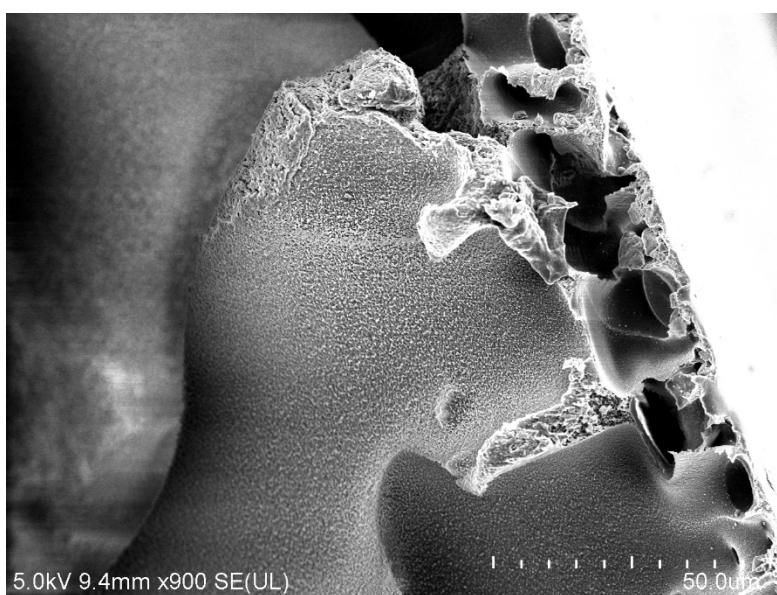

**Fig. S5.** SEM image of PPC-700 membrane's cross section.

Supplement: d4ra00488d7.pdf [file d4ra00488d7.pdf]
